# Supplementary material for: Rod Monochromacy and the Coevolution of Cetacean Retinal Opsins
Source: PubMed Central journal article supplement (PMC3630094; doi:10.1371/journal.pgen.1003432), 2013-04-18

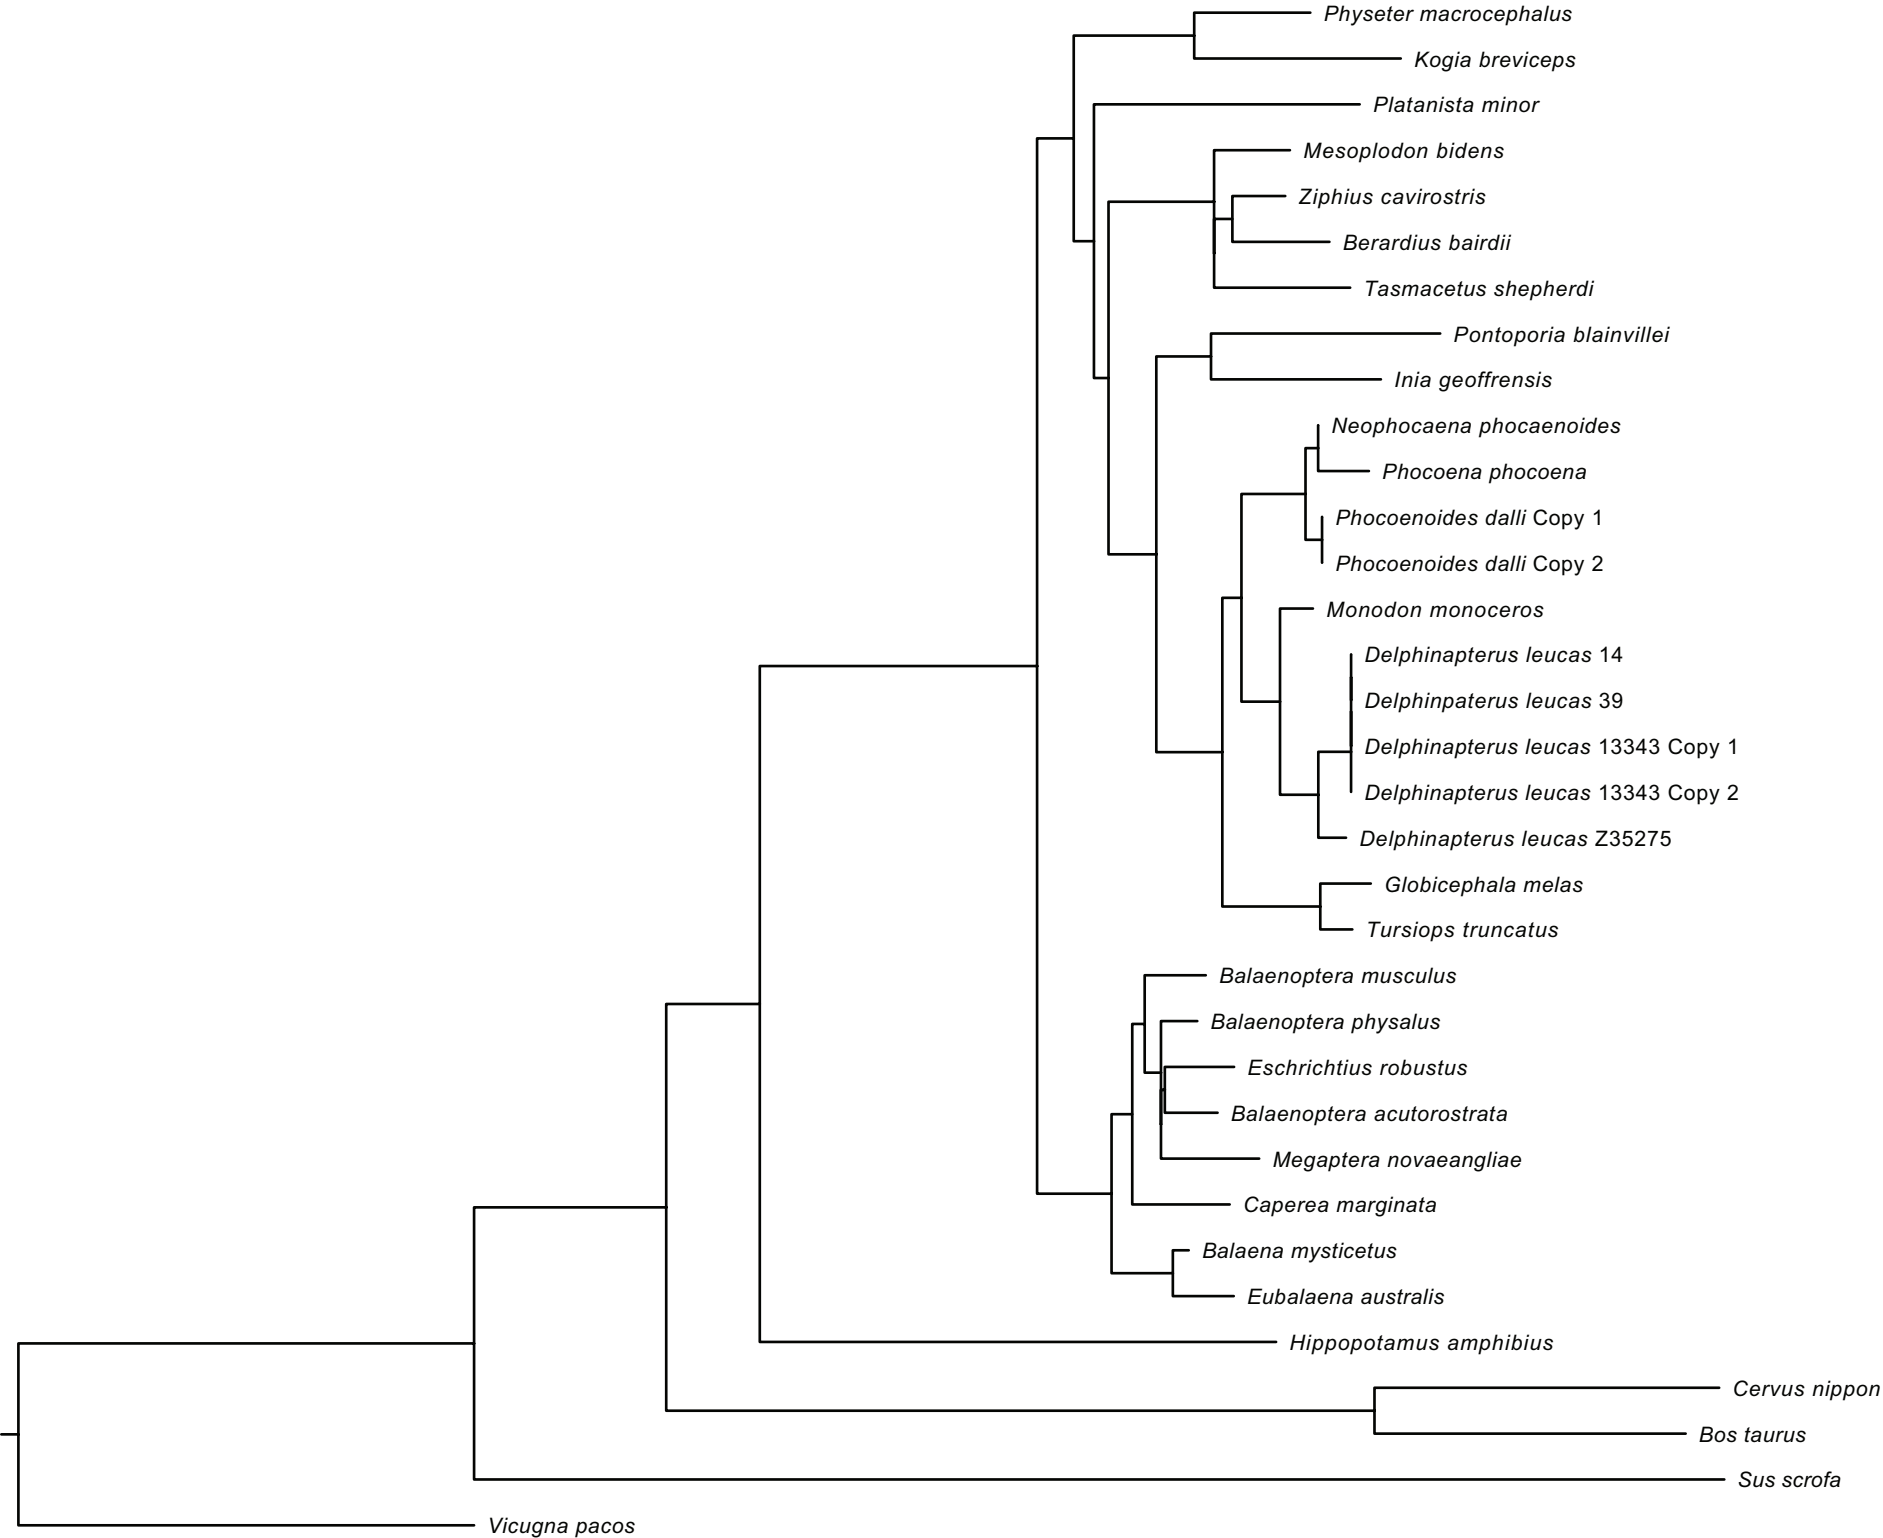

Supplement: pgen.1003432.s001.pdf [file pgen.1003432.s001.pdf]
