# Supplementary material for: Rod Monochromacy and the Coevolution of Cetacean Retinal Opsins
Source: PubMed Central journal article supplement (PMC3630094; doi:10.1371/journal.pgen.1003432), 2013-04-18
Supplement: pgen.1003432.s007.pdf [file pgen.1003432.s007.pdf]

Table S1

| Cetartiodactyla Taxa                                       | Retinal Opsin Gene |            |            |
|------------------------------------------------------------|--------------------|------------|------------|
|                                                            | <i>SWS1</i>        | <i>LWS</i> | <i>RHI</i> |
| <b>Balaenidae</b>                                          |                    |            |            |
| <i>Eubalaena australis</i> (southern right whale)          | *                  | *          |            |
| <i>Eubalaena glacialis</i> (North Atlantic right whale)    |                    |            | JQ730751   |
| <i>Balaena mysticetus</i> (bowhead whale)                  | *                  | *          | *          |
| <b>Neobalaenidae</b>                                       |                    |            |            |
| <i>Caperea marginata</i> (pygmy right whale)               | *                  | *          | *          |
| <b>Eschrichtiidae</b>                                      |                    |            |            |
| <i>Eschrichtius robustus</i> (grey whale)                  | *                  | *          | *          |
| <b>Balaenopteridae</b>                                     |                    |            |            |
| <i>Balaenoptera acutorostrata</i> (common minke whale)     | *                  | *          | *          |
| <i>Balaenoptera physalus</i> (fin whale)                   | *                  | *          | *          |
| <i>Balaenoptera musculus</i> (blue whale)                  | *                  | *          | *          |
| <i>Megaptera novaeangliae</i> (humpback whale)             | AY228440           | *          | *          |
| <b>Delphinidae</b>                                         |                    |            |            |
| <i>Globicephala melas</i> (long-finned pilot whale)        | AY228442           | AY228446   | AF055315   |
| <i>Tursiops truncatus</i> (common bottlenose dolphin)      | Ensembl 58         | AF055457   | AF055456   |
| <i>Delphinus delphis</i> (short-beaked common dolphin)     |                    | AY228451   | AF055314   |
| <b>Monodontidae</b>                                        |                    |            |            |
| <i>Delphinapterus leucas</i> Z35275 (beluga)               | *                  | *          | *          |
| <i>Delphinapterus leucas</i> SWFSC Z13343 (beluga)         | *                  |            |            |
| <i>Delphinapterus leucas</i> NYSZ 14 (beluga)              | *                  |            |            |
| <i>Delphinapterus leucas</i> NYSZ 39 (beluga)              | *                  |            |            |
| <i>Monodon monoceros</i> (narwhal)                         | *                  |            |            |
| <b>Phocoenidae</b>                                         |                    |            |            |
| <i>Phocoena phocoena</i> (harbor porpoise)                 | *                  | AY228450   | *          |
| <i>Neophocaena phocaenoides</i> (finless porpoise)         | *                  | *          | *          |
| <i>Phocoenoides dalli</i> (Dall's porpoise)                | *                  | *          | *          |
| <b>Iniidae</b>                                             |                    |            |            |
| <i>Inia geoffrensis</i> (Amazon River dolphin)             | *                  | *          | *          |
| <b>Pontoporiidae</b>                                       |                    |            |            |
| <i>Pontoporia blainvillei</i> (La Plata dolphin)           | *                  | *          | *          |
| <b>Platanistidae</b>                                       |                    |            |            |
| <i>Platanista minor</i> (Indus River dolphin)              | *                  | *          | *          |
| <b>Physeteridae</b>                                        |                    |            |            |
| <i>Physeter macrocephalus</i> (giant sperm whale)          | *                  | *          | *          |
| <b>Kogiidae</b>                                            |                    |            |            |
| <i>Kogia breviceps</i> (pygmy sperm whale)                 | *                  | *          | *          |
| <b>Ziphiidae</b>                                           |                    |            |            |
| <i>Mesoplodon bidens</i> (Sowerby's beaked whale)          | *                  | *          | AF055316   |
| <i>Mesoplodon densirostris</i> (Blainville's beaked whale) | AY228441           |            |            |
| <i>Berardius bairdii</i> (Baird's beaked whale)            | *                  | *          | *          |
| <i>Tasmacetus shepherdi</i> (Shepherd's beaked whale)      | *                  | *          | *          |
| <i>Ziphius cavirostris</i> (Cuvier's beaked whale)         | *                  | *          | *          |
| <b>Hippopotamidae</b>                                      |                    |            |            |
| <i>Hippopotamus amphibius</i> (hippopotamus)               | *                  | *          | *          |
| <b>Cervidae</b>                                            |                    |            |            |
| <i>Cervus nippon</i> (sika deer)                           | *                  |            |            |
| <i>Odocoileus virginianus</i> (white-tailed deer)          |                    | AF132041   |            |

|                                  |            |              |              |
|----------------------------------|------------|--------------|--------------|
| Bovidae                          |            |              |              |
| <i>Bos taurus</i> (cow)          | Ensembl 58 | NM_174566    | NM_001014890 |
| <i>Ovis aries</i> (sheep)        |            | PreEnsembl   | PreEnsembl   |
| Suidae                           |            |              |              |
| <i>Sus scrofa</i> (domestic pig) | Ensembl 58 | NM_001011506 | NM_214221    |
| Camelidae                        |            |              |              |
| <i>Vicugna pacos</i> (alpaca)    | Ensembl 58 |              | Ensembl 66   |

---
