# Supplementary material for: Rod Monochromacy and the Coevolution of Cetacean Retinal Opsins
Source: PubMed Central journal article supplement (PMC3630094; doi:10.1371/journal.pgen.1003432), 2013-04-18
Supplement: pgen.1003432.s008.pdf [file pgen.1003432.s008.pdf]

Table S2

|                |                                 |
|----------------|---------------------------------|
| LWS-Ex1Cet-IF3 | GGTTTGGGAGCTTTTAAGGTGARGAG      |
| LWS-Ex1Cet-IF4 | GGCTGGTATAAAGCRCCGTGACC         |
| LWS-Ex1Cet-IR1 | CCATTCATGTTATCATAAAGGCTAMG      |
| LWS-Ex1Cet-IR2 | CGATATTACGGTGTCTTTTTAYATTCAG    |
| LWS-Ex1Cet-IR3 | CAGCCTTWGCACCTAYTCGCTCAC        |
| LWS-Ex1Cet-IR4 | GCCAGCRTGACCCAGCCTTWGCAC        |
| LWS-Ex1Cet-IR5 | GGAAGCCCATGTGGTTTCAAARTG        |
| LWS-Ex1Cet-IR6 | CTCAAAGGGTCTGGGAAGCCCATG        |
| LWS-Ex1CetF1   | GGARGTCTAAGTCCCAGGCCCAATTAAGAG  |
| LWS-Ex1CetF2   | GGCCCAATTAAGAGATCAGATGGYGAARGG  |
| LWS-Ex1CetR1   | CTRACTCRTCTTTGCRTCTCCCAAAGCC    |
| LWS-Ex1CetR2   | GGTGAGTGMCTTCGAGAGCCTAAGG       |
| LWS-Ex2Cet-IF1 | GACCAGTCGCAAAGGTGAGTGMGGC       |
| LWS-Ex2Cet-IF2 | GGCTGAGGGGAGATTCTGATGGGGYG      |
| LWS-Ex2Cet-IF3 | GGGCGGCACAGATGTAGCTGTSC         |
| LWS-Ex2Cet-IF4 | CNCTSTGTGTCTCCTGCCTCCAG         |
| LWS-Ex2Cet-IR3 | GTGCCCAGGCCCGGCTGGCTTAC         |
| LWS-Ex2CetF1   | GCYTTGTTAAGTTCAAGGATGCCCRTGCAGG |
| LWS-Ex2CetF2   | GCAGGYCGTGGCCTCGRGYTTGAGAGAC    |
| LWS-Ex2CetR1   | CAGCTSCCGRCGTAAAGGARACMTCATG    |
| LWS-Ex2CetR2   | GGCAAATCMGCAGAKGTAGCTSTGGG      |
| LWS-Ex3Cet-IR1 | GCTGCYCCTGTTTGGGAGAAACAGAC      |
| LWS-Ex3Cet-IR2 | CCCTCAGCAGGTGCAAGAAAGAGGC       |
| LWS-Ex3Cet-IR3 | GCCTTCCTGGCACCCCTGGCATCCTTAC    |
| LWS-Ex3Cet-IR4 | GYTCTAAACKAATCGCCTTCCTGGCACCC   |
| LWS-Ex3Cet-IR5 | GGGAGAAACAGACATTTGCAGAGGCTTGG   |
| LWS-Ex3Cet-IR6 | GCTGYTCCTGTTTGGGAGAAACAGAC      |
| LWS-Ex3CetF1   | CAGGKGTTAGAGAAAGAAACTGACCAAGAG  |
| LWS-Ex3CetF2   | GTTGMCTCAAAGCCCTCCTMTGTCTGC     |
| LWS-Ex3CetR1   | GGTGAYGGATGCACAACAYTGTGAATG     |
| LWS-Ex3CetR2   | CAACAYTGTGAATGYACCAAACCTC       |
| LWS-Ex4Cet-IF1 | GGTTAATTCATGTAAYGTGMATTTTC      |
| LWS-Ex4Cet-IF2 | GCCCAACAACCTTACCCAAGTCMGTGG     |
| LWS-Ex4Cet-IF3 | CCTTACCCAAGTCMGTGGTGTGCTGG      |
| LWS-Ex4Cet-IR1 | GCCTAGACCTCCCYGGCGTTCAYG        |
| LWS-Ex4Cet-IR2 | GGTCCTYTGTGCCAGCCTAGACCTCC      |
| LWS-Ex4CetF1   | GGTGAYGGATGCACAACAYTGTGAATG     |
| LWS-Ex4CetF2   | CAACAYTGTGAATGYACCAAACCTC       |
| LWS-Ex4CetR1   | CACAGAGGACCGCMCAGTCYGCTCTCC     |

|                  |                                   |
|------------------|-----------------------------------|
| LWS-Ex4CetR2     | CAGTCYGCTCTCCWGCCTCMAAGCCAG       |
| LWS-Ex5Cet-IF1   | GGCCCATCTGCTTCTCCCCRCTACCCTCC     |
| LWS-Ex5Cet-IF2   | CCCCRCTACCCTCCCTGACTAGCTAC        |
| LWS-Ex5Cet-IF3   | GAATCCCCTGGGGTACGGAGCCCTGAGG      |
| LWS-Ex5Cet-IF4   | GGCSACTCTCTGTCTCYCCCCCAG          |
| LWS-Ex5Cet-IR1   | GCTCTGTCAACTGCGTGACTTA            |
| LWS-Ex5Cet-IR2   | CCATCTGCAGTTTGCTCTGTCAACTG        |
| LWS-Ex5CetF1     | CTTTCCTCTACRAAGCRGCTTGTGCCAC      |
| LWS-Ex5CetF2     | GCTTGTGCCACAATCGGMTCAGC           |
| LWS-Ex5CetR1     | CAAACRCAGATGGACCCYGGAAGAGC        |
| LWS-Ex5CetR2     | GACCCYGGAAGAGCCAGTKATGGCTCCC      |
| LWS-Ex6Cet-IF1   | GCTCTGCTCARTRACACTTTCTGTCC        |
| LWS-Ex6Cet-IF1   | GCTCTGCTCARTRACACTTTCTGTCC        |
| LWS-Ex6Cet-IR1   | GTTACGTTKCCAGTGGGAGACAGRCGAC      |
| LWS-Ex6Cet-IR1   | GTTACGTTKCCAGTGGGAGACAGRCGAC      |
| LWS-Ex6Cet-IR2   | CTCGGTTGCTTTYGGCAAAGAGAACTAC      |
| LWS-Ex6Cet-IR3   | GTGGCAGCCTCTATGACTCGGTTGCTTTYGGC  |
| LWS-Ex6CetF1     | CATTTAGCCTAGCAYGCTGGCCCTRCC       |
| LWS-Ex6CetF2     | CAYGCTGGCCTRCCTGCTCTGC            |
| LWS-Ex6CetR1     | GAGWTGYTCATCTTTMTAAGCCTCSTGTC     |
| LWS-Ex6CetR2     | GGAGCTAGCRAAGCCAGGCCCTTTAAGGC     |
| RH1-Ex1Cet-IF1   | CAGAGCCTGGAGYCATCCAGCCGGAGCCC     |
| RH1-Ex1Cet-IF2   | CCAGCCGGAGCCCTGYGTGGCTGAGCTC      |
| RH1-Ex1Cet-IR1   | CCYGTACCCGCACCCAGCTCATAC          |
| RH1-Ex1Cet-IR2   | CCTGGCTCCTGTAGCCCCYGTACCCGCACC    |
| RH1-Ex1F1        | GTGRGGATTAATATGATTAATAAYGCC       |
| RH1-Ex1F2        | CCCAATCKCSCAGGTGCTGATTCAGCC       |
| RH1-Ex1R1        | CCMCCAYCCCCAAGGCHGRGGCTG          |
| RH1-Ex1R2        | CCCTCVACAAACGWCAGCCKAGC           |
| RH1-Ex2Cet-IF1   | GGTCCAGCCACGTGGCRTGTTGACTGAC      |
| RH1-Ex2Cet-IF2   | GGCRTGTTGACTGACAGCTGGCTRCCTTGC    |
| RH1-Ex2Cet-IR1   | GTCYCCTTGACATGGGGACCAGCCCCAYAGC   |
| RH1-Ex2Cet-IR2   | GGGGTGTCTTGGAGTCYCCTTGACATGG      |
| RH1-Ex2F1        | CYCAKTTGTTACATKTCCCTGGARG         |
| RH1-Ex2F2        | CAGCCRTGACCCCGYGACMCGATTKCTGTG    |
| RH1-Ex2R1        | GCCAAGGTGAAWGGTTGGGGYGTCTTGG      |
| RH1-Ex2R2        | GTTGVGGATTAGGGGCACAGCCAAGGTG      |
| RH1-Ex3-4Cet-IF1 | GACTCTGKTCAGCTGGGCCTGTTCCCARG     |
| RH1-Ex3-4Cet-IF2 | CCTGTTCCCARGTCCCTCACAYGTGGGTCTCCC |
| RH1-Ex3-4Cet-IF3 | CATMTTCTTCTGCTACGGGCAGCTGGTC      |
| RH1-Ex3-4Cet-IF4 | GGGCAGCTGGTCTTACAGTCAAGGAG        |

|                  |                                    |
|------------------|------------------------------------|
| RH1-Ex3-4Cet-IR1 | CCATGCGAGTGACCTCCTTCTCGGCCTTC      |
| RH1-Ex3-4Cet-IR2 | CCATGATGAYGACCATGCGAGTGACCTCC      |
| RH1-Ex3-4Cet-IR3 | GGACCCTCCCCGCCYACCAGCAGGCAC        |
| RH1-Ex3-4Cet-IR4 | GTGGCCTTGGGGGACCYGGACCCTCCCGCC     |
| RH1-Ex3-4F1      | CAGKGAMACAACACTGTTTSCAC            |
| RH1-Ex3-4F2      | GYGAGGCCAGAGTGAGASCAGCC            |
| RH1-Ex3-4R1      | CCATTTTGCAGGTGGAASGACBGARG         |
| RH1-Ex3-4R2      | CCAGGARTCTGMATTTCTCCCAGATGAC       |
| RH1-Ex5Cet-IF1   | GGACCCTGACACTGACTCATGCC            |
| RH1-Ex5Cet-IF2   | CTGACTCATGCCCTTYCTTCCAG            |
| RH1-Ex5Cet-IR1   | CCTACAGTTGGCCACAGAGTC              |
| RH1-Ex5Cet-IR2   | GGGAGACTCCTACAGTTGGCC              |
| RH1-Ex5F1        | GCTGTGTGRCCTTGGGCAAGTMACTTCCC      |
| RH1-Ex5F2        | CAAGTMACTTCCCTTCTYTGGGCWTCAG       |
| RH1-Ex5R1        | CCTGTGSGAWCTGGTTCYGACAGG           |
| RH1-Ex5R2        | ACTCAGGGAWCCTGTGSGAWCTGG           |
| SWS1-CetF4       | GGCCTTCTTGGBCCTTTGAGCGCTACATYATC   |
| SWS1-CetF1       | GGGAGGATRATCTATAAGAGGAATCAG        |
| SWS1-CetF10      | CWAGGAGGGTTCCTGTCKTVTAGRGC         |
| SWS1-CetF2       | CTATAAGAGGAATCAGAGRGGGTGGKGGACATCC |
| SWS1-CetF3       | CAGGCTGGTCMCTGGCCTTCTTGGBCCTTG     |
| SWS1-CetF5       | CYGTGGGCACCAARTAYTACAGCGAG         |
| SWS1-CetF6       | CCAARTAYTACAGCGAGTAYTATACCTGG      |
| SWS1-CetF7       | GCTGCCCTKGCCATGTATATAGTCAACAACC    |
| SWS1-CetF8       | GTATATAGTCAACAACCRTAACCBGGG        |
| SWS1-CetF9       | AACTCAGAYAAATCWAGGAGGGTTCCT        |
| SWS1-CetIF1      | GRGGCCTTCTGGGCHGTRCAGCAGGTA        |
| SWS1-CetIF2      | GGGAGACAAGKGCTAAAGTTTACYCTG        |
| SWS1-CetIF3      | GAGAGCTGSCTCCATCTYGCCTTCTCAA       |
| SWS1-CetIF4      | GGACTCYACTCWAAGGSTTTCTAGKGG        |
| SWS1-CetIF5      | GRGTYAGCCAGAATGTGYAGGGATTA         |
| SWS1-CetIR1      | GRTDGAACCAGGGRCCAGKCTGTTGG         |
| SWS1-CetIR2      | GTTCTAAGHGGAGAACAAYC               |
| SWS1-CetIR3      | GGGACTAGGCCAGAAGSTGGGACAGMAGAGA    |
| SWS1-CetIR4      | GTAAGCMCAGGGATGAAGGYGTGGTC         |
| SWS1-CetIR5      | CTTCTGABGTKATCTCCTCKGTAC           |
| SWS1-CetR1       | GYGTCTCCATCCCACCSTTCTTTGGCTG       |
| SWS1-CetR10      | CTACYGTCTCTTAGCCAAGTTGGCCCC        |
| SWS1-CetR2       | CCATCCCACCCTTCTTTGGCTGGAGCCG       |
| SWS1-CetR3       | CATCTGCTTCTCCTACTCTCAGCTGCTGGGG    |
| SWS1-CetR4       | CCTACTCTCAGCTGCTGGGGGCCYTCAGAGC    |

|            |                                |
|------------|--------------------------------|
| SWS1-CetR5 | CTTGYATCTACAATCCSATCATCTACTGC  |
| SWS1-CetR6 | CCSATCATCTACTGCTTCATGAATAAGCAG |
| SWS1-CetR7 | GMATTGGCAGTCCTTTCCCAGTTGGRAGC  |
| SWS1-CetR8 | CAGTCCTTTCCTAGTTGGRAGCACYTTC   |
| SWS1-CetR9 | GAAGTKTCTACYGTCTCTTCTAGCC      |
